# Supplementary material for: Strong chemisorption of CO on M@Bn−(M = Co, Ir, Rh, Ru, Ta, Nb,n= 8–10) clusters: an implication for wheel boron clusters as CO gas detectors
Source: Royal Society of Chemistry journal article supplement (doi:10.1039/c5ra15151a), 2015-01-01
Supplement: c5ra15151a1.pdf [file c5ra15151a1.pdf]

**Electronic supplementary information for:**

**Strong chemisorption of CO on  $M@B_n$  ( $M=Co, Ir, Rh, Ru, Ta, Nb, n=8-10$ )  
clusters: An implication for the wheel boron clusters as CO gas detector**

Cong Ren<sup>a</sup>, Weihua Wang<sup>\*,a</sup>, Chao Guo<sup>a</sup>, Ping Li<sup>\*,a</sup>, Yuxia Liu<sup>a</sup>, Siwei Bi<sup>a</sup>,  
Zhen Li<sup>b</sup>, Qiao Sun<sup>\*,b</sup>

<sup>a</sup> Key Laboratory of Life-Organic Analysis, School of Chemistry and Chemical Engineering,  
Qufu Normal University, Qufu, 273165, P. R. China

<sup>b</sup> Collaborative Innovation Center of Radiation Medicine of Jiangsu Higher Education  
Institutions, School for Radiological and Interdisciplinary Sciences, Soochow University,  
Suzhou, 215123, P. R. China

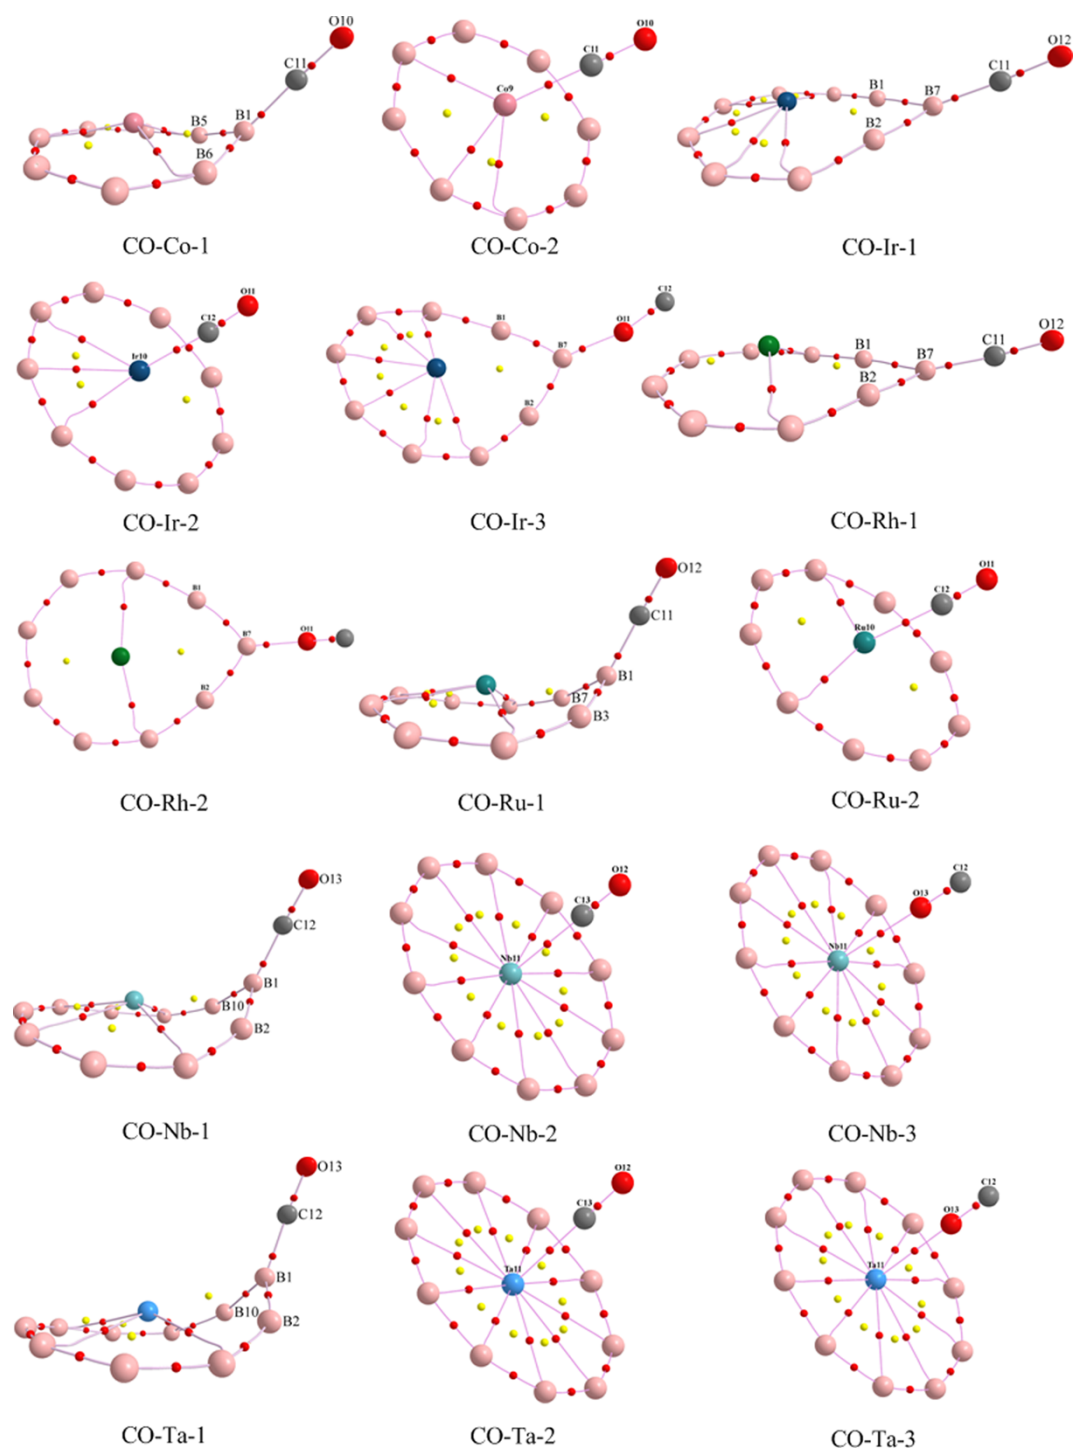

**Fig. S1** The molecular graphs of the formed complexes of boron clusters with the CO molecule, where the BCP and RCP are denoted as small red and yellow dots, respectively.

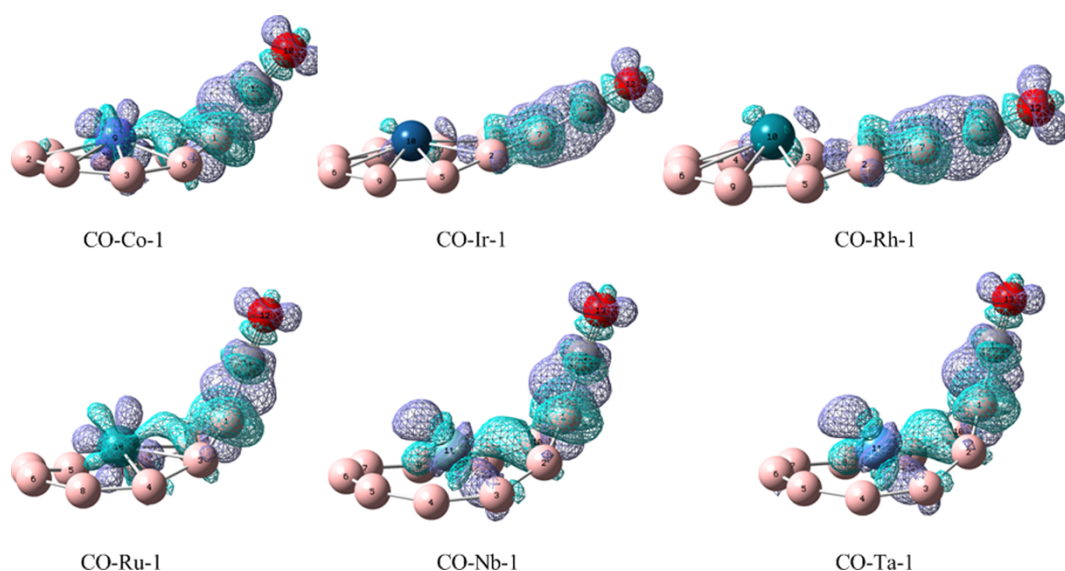

**Fig. S2** Electron density difference map for the formation of the CO-M-1 complexes. The blue and purple regions represent the depleted and increased electron density, respectively. The isodensity contours are 0.004 electron/bohr<sup>3</sup>.

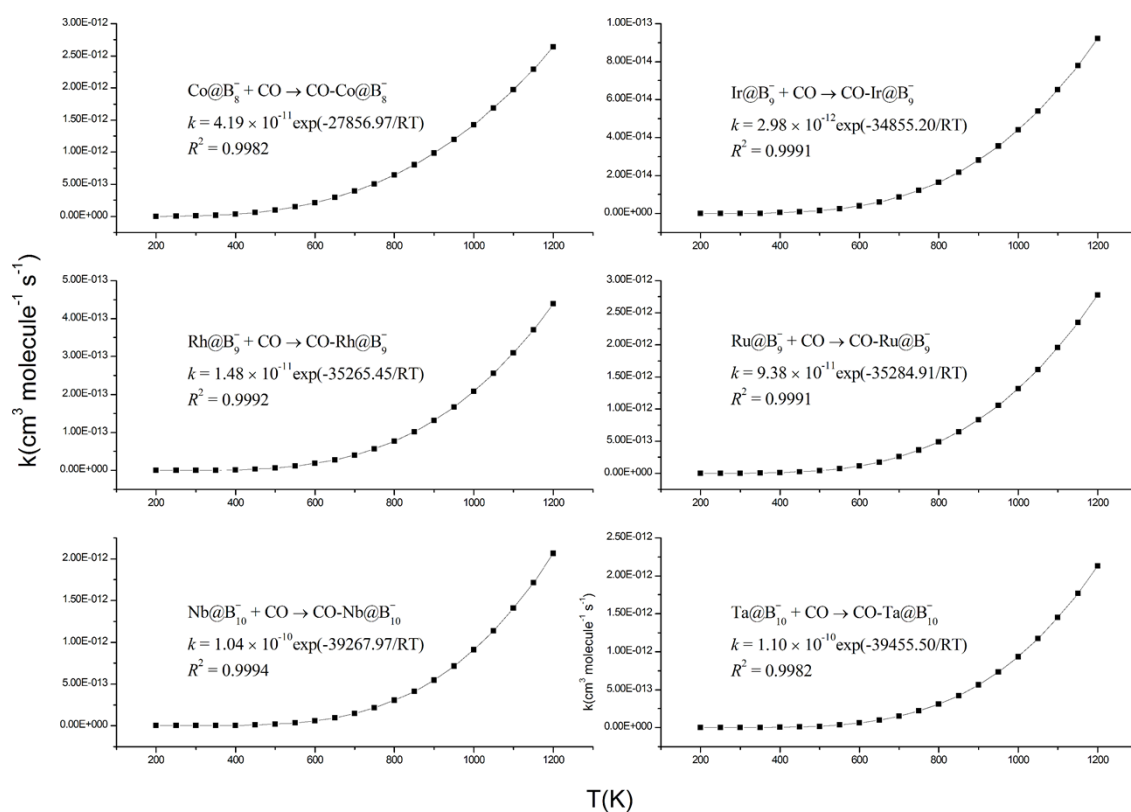

**Fig. S3** The dependence of the rate constants versus temperatures ranging from 200.0 to 1200.0 K for the formation of the CO-M-1(M=Co, Ir, Rh, Ru, Ta, Nb) complexes.

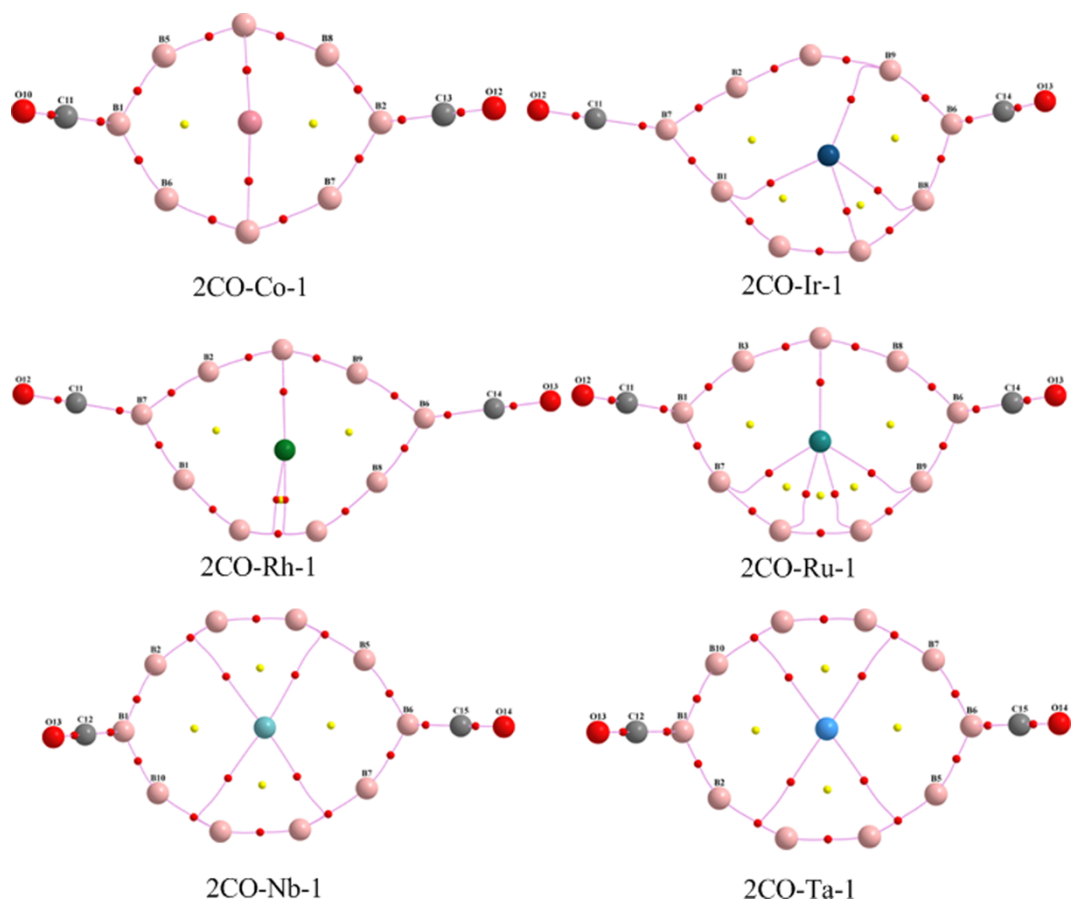

**Fig. S4** The molecular graphs of the formed complexes of boron clusters with two CO gas molecules.

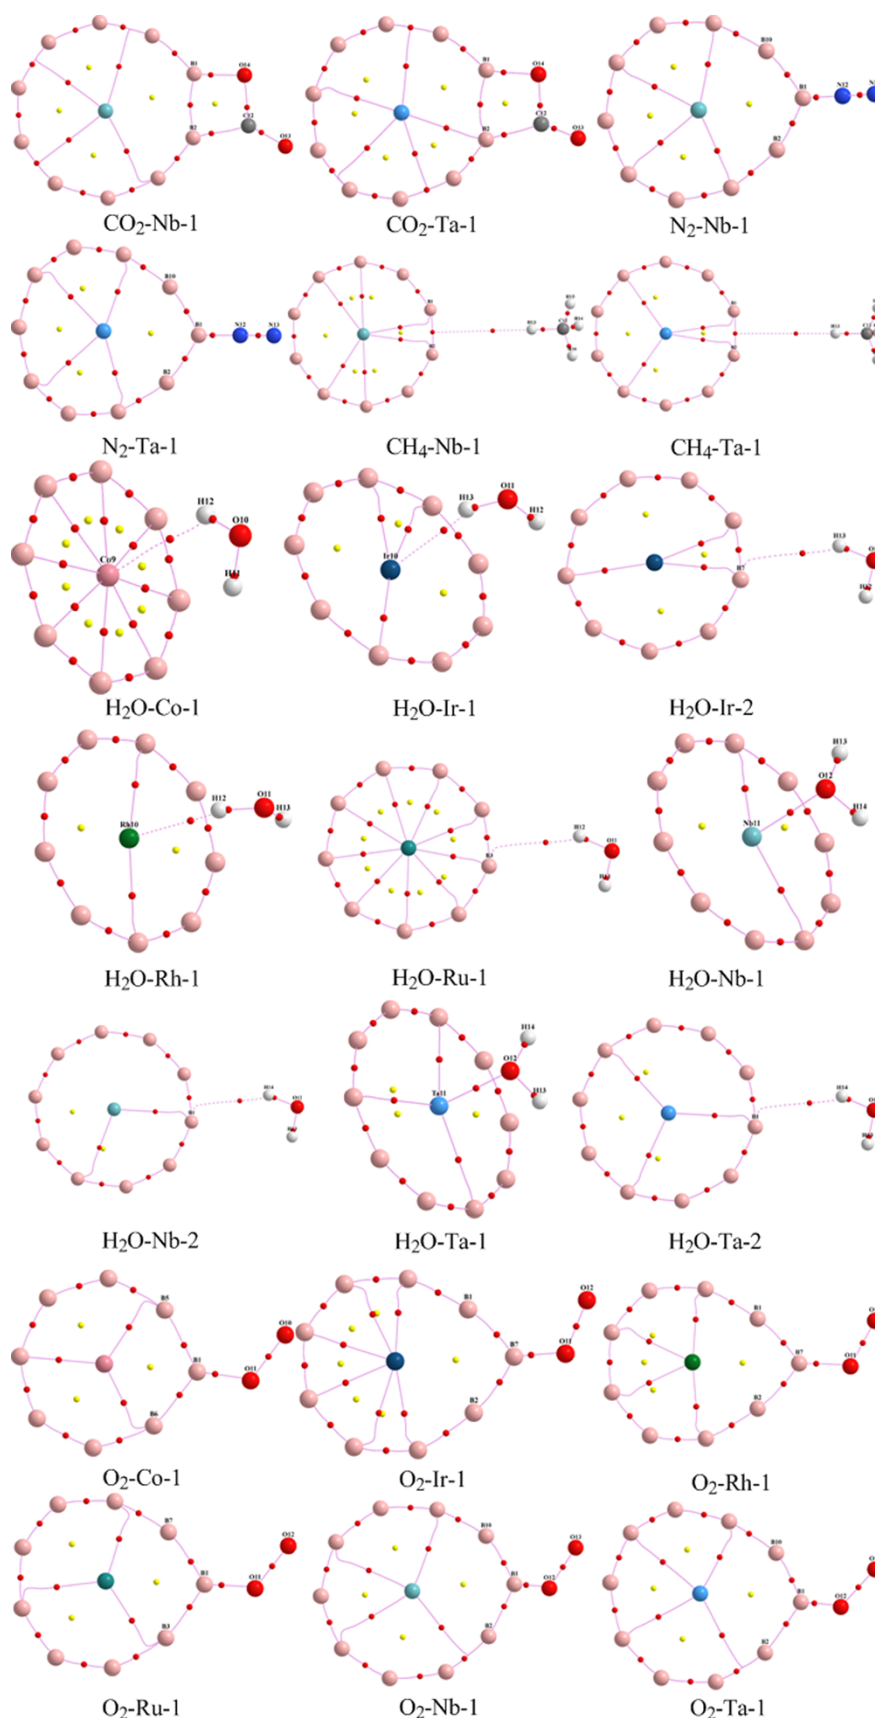

**Fig. S5** The molecular graphs of the formed complexes of boron clusters with the CO<sub>2</sub>, N<sub>2</sub>, CH<sub>4</sub>, H<sub>2</sub>O, and O<sub>2</sub> gas molecules, where the BCP and RCP are denoted as small red and yellow dots, respectively. Only the formed singlet and doublet complexes involving O<sub>2</sub> have been given due to their similar geometries.

**Table S1.** The calculated topological parameters at the BCPs for the formed complexes of boron clusters with small gas molecules<sup>a</sup>

| Complexes             | BCP        | $\rho_{\text{bcp}}$ | $\nabla^2\rho_{\text{bcp}}$ | $V_{\text{bcp}}$ | $G_{\text{bcp}}$ | $H_{\text{bcp}}$ |
|-----------------------|------------|---------------------|-----------------------------|------------------|------------------|------------------|
| CO-Co-2               | Co9...C11  | 0.1382              | 0.4897                      | -0.2502          | 0.1863           | -0.0639          |
| CO-Ir-2               | Ir10...C12 | 0.1894              | 0.4857                      | -0.3266          | 0.2240           | -0.1026          |
| CO-Ir-3               | B7...O11   | 0.1376              | 0.8366                      | -0.3556          | 0.2824           | -0.0732          |
| CO-Rh-2               | B7...O11   | 0.1322              | 0.7684                      | -0.3331          | 0.2626           | -0.0705          |
| CO-Ru-2               | Ru10...C12 | 0.1506              | 0.5227                      | -0.2410          | 0.1858           | -0.0552          |
| CO-Nb-2               | Nb11...C13 | 0.0844              | 0.2843                      | -0.0971          | 0.0841           | -0.0130          |
| CO-Nb-3               | Nb11...O13 | 0.0342              | 0.2314                      | -0.0404          | 0.0491           | 0.0087           |
| CO-Ta-2               | Ta11...C13 | 0.0941              | 0.2607                      | -0.1045          | 0.0848           | -0.0197          |
| CO-Ta-3               | Ta11...O13 | 0.0422              | 0.2588                      | -0.0488          | 0.0567           | 0.0080           |
| 2CO-Co-1              | B2...C13   | 0.1718              | 0.4950                      | -0.4133          | 0.2685           | -0.1448          |
| 2CO-Ir-1              | B6...C14   | 0.1707              | 0.4833                      | -0.4087          | 0.2648           | -0.1439          |
| 2CO-Rh-1              | B6...C14   | 0.1810              | 0.4695                      | -0.4368          | 0.2771           | -0.1597          |
| 2CO-Ru-1              | B6...C14   | 0.1759              | 0.4885                      | -0.4243          | 0.2732           | -0.1511          |
| 2CO-Nb-1              | B6...C15   | 0.1749              | 0.5148                      | -0.4262          | 0.2775           | -0.1488          |
| 2CO-Ta-1              | B6...C15   | 0.1745              | 0.5138                      | -0.4249          | 0.2767           | -0.1482          |
| CO <sub>2</sub> -Nb-1 | B2...C12   | 0.1655              | -0.1444                     | -0.2875          | 0.1257           | -0.1618          |
|                       | B1...O14   | 0.1832              | 0.6844                      | -0.4641          | 0.3176           | -0.1465          |
| CO <sub>2</sub> -Ta-1 | B2...C12   | 0.1737              | -0.0795                     | -0.3239          | 0.1520           | -0.1719          |
|                       | B1...O14   | 0.1923              | 0.7032                      | -0.4943          | 0.3351           | -0.1593          |
| N <sub>2</sub> -Nb-1  | B1...N12   | 0.1520              | 0.8794                      | -0.4115          | 0.3157           | -0.0958          |
| N <sub>2</sub> -Ta-1  | B1...N12   | 0.1508              | 0.8734                      | -0.4076          | 0.3130           | -0.0946          |
| CH <sub>4</sub> -Nb-1 | B2...H13   | 0.0025              | 0.0055                      | -0.0008          | 0.0011           | 0.0003           |
| CH <sub>4</sub> -Ta-1 | B2...H13   | 0.0024              | 0.0053                      | -0.0008          | 0.0010           | 0.0003           |
| H <sub>2</sub> O-Co-1 | Co9...H12  | 0.0099              | 0.0180                      | -0.0059          | 0.0052           | -0.0007          |
| H <sub>2</sub> O-Ir-1 | Ir10...H13 | 0.0119              | 0.0268                      | -0.0053          | 0.0060           | 0.0007           |
| H <sub>2</sub> O-Ir-2 | B7...H13   | 0.0111              | 0.0240                      | -0.0042          | 0.0051           | 0.0009           |
| H <sub>2</sub> O-Rh-1 | Rh10...H12 | 0.0094              | 0.0212                      | -0.0042          | 0.0047           | 0.0006           |
| H <sub>2</sub> O-Ru-1 | B3...H12   | 0.0114              | 0.0242                      | -0.0043          | 0.0052           | 0.0009           |
| H <sub>2</sub> O-Nb-1 | Nb11...O12 | 0.0483              | 0.2468                      | -0.0509          | 0.0563           | 0.0054           |
| H <sub>2</sub> O-Nb-2 | B1...H14   | 0.0119              | 0.0251                      | -0.0045          | 0.0054           | 0.0009           |
| H <sub>2</sub> O-Ta-1 | Ta11...O12 | 0.0556              | 0.2540                      | -0.0568          | 0.0601           | 0.0034           |
| H <sub>2</sub> O-Ta-2 | B1...H14   | 0.0117              | 0.0251                      | -0.0045          | 0.0054           | 0.0009           |
| O1-Co-1               | B1...O11   | 0.2036              | 1.0268                      | -0.5751          | 0.4159           | -0.1592          |
|                       |            | <i>0.1608</i>       | <i>0.6725</i>               | <i>-0.3954</i>   | <i>0.2817</i>    | <i>-0.1136</i>   |
| O1-Ir-1               | B7...O11   | 0.1693              | 0.7411                      | -0.4291          | 0.3072           | -0.1219          |
|                       |            | <i>0.1718</i>       | <i>0.7532</i>               | <i>-0.4377</i>   | <i>0.3130</i>    | <i>-0.1247</i>   |
| O1-Rh-1               | B7...O11   | 0.1721              | 0.7611                      | -0.4403          | 0.3153           | -0.1250          |
|                       |            | <i>0.1755</i>       | <i>0.7714</i>               | <i>-0.4517</i>   | <i>0.3223</i>    | <i>-0.1294</i>   |
| O1-Ru-1               | B1...O11   | 0.1936              | 0.9940                      | -0.5384          | 0.3935           | -0.1449          |
|                       |            | <i>0.1719</i>       | <i>0.7637</i>               | <i>-0.4401</i>   | <i>0.3155</i>    | <i>-0.1246</i>   |
| O1-Nb-1               | B1...O12   | 0.1914              | 0.9906                      | -0.5315          | 0.3896           | -0.1419          |
| O1-Ta-1               | B1...O12   | 0.1903              | 0.9825                      | -0.5271          | 0.3864           | -0.1407          |
|                       |            | <i>0.1725</i>       | <i>0.7605</i>               | <i>-0.4416</i>   | <i>0.3159</i>    | <i>-0.1257</i>   |

<sup>a</sup> The data with italics refer to the results of the triplet and quartet complexes involving O<sub>2</sub>. The  $\rho_{\text{bcp}}$ ,  $\nabla^2\rho_{\text{bcp}}$ ,  $V_{\text{bcp}}$ ,  $G_{\text{bcp}}$ , and  $H_{\text{bcp}}$  is electron density, the Laplacian of the electron density, potential energy density, kinetic energy density, and energy density at the BCP, respectively.

**Table S2.** The calculated adsorption energies and thermodynamic parameters for the CO, CO<sub>2</sub>, N<sub>2</sub>, CH<sub>4</sub>, H<sub>2</sub>O, and O<sub>2</sub> adsorption on the boron clusters<sup>a</sup>

| Complexes             | $\Delta E_{\text{ads}}$ | $\Delta H$    | $\Delta G$    |
|-----------------------|-------------------------|---------------|---------------|
| CO-Co-2               | 14.16                   | 10.40         | 18.42         |
| CO-Ir-2               | 12.78                   | 4.33          | 15.53         |
| CO-Ir-3               | 25.43                   | 22.97         | 35.68         |
| CO-Rh-2               | 26.09                   | 24.00         | 35.75         |
| CO-Ru-2               | 9.66                    | 7.56          | 15.77         |
| CO-Nb-2               | -30.48                  | -32.81        | -23.15        |
| CO-Nb-3               | -4.47                   | -6.26         | 2.68          |
| CO-Ta-2               | -36.84                  | -39.76        | -30.16        |
| CO-Ta-3               | -5.93                   | -8.44         | 0.81          |
| 2CO-Co-1              | -25.13                  | -26.98        | -16.80        |
| 2CO-Ir-1              | -26.58                  | -28.35        | -18.16        |
| 2CO-Rh-1              | -34.40                  | -35.95        | -27.08        |
| 2CO-Ru-1              | -30.80                  | -32.58        | -22.63        |
| 2CO-Nb-1              | -30.81                  | -32.66        | -22.05        |
| 2CO-Ta-1              | -30.23                  | -32.11        | -21.44        |
| CO <sub>2</sub> -Nb-1 | -11.86                  | -14.34        | -5.71         |
| CO <sub>2</sub> -Ta-1 | -11.50                  | -14.30        | -3.97         |
| N <sub>2</sub> -Nb-1  | 4.39                    | 2.28          | 12.12         |
| N <sub>2</sub> -Ta-1  | 4.60                    | 2.44          | 12.32         |
| CH <sub>4</sub> -Nb-1 | 0.09                    | 0.68          | 1.59          |
| CH <sub>4</sub> -Ta-1 | 0.04                    | 0.68          | 1.46          |
| H <sub>2</sub> O-Co-1 | -4.00                   | -5.40         | -1.19         |
| H <sub>2</sub> O-Ir-1 | -4.82                   | -5.97         | 1.55          |
| H <sub>2</sub> O-Ir-2 | -4.66                   | -5.36         | 1.75          |
| H <sub>2</sub> O-Rh-1 | -4.55                   | -5.33         | 1.46          |
| H <sub>2</sub> O-Ru-1 | -5.13                   | -5.66         | -0.31         |
| H <sub>2</sub> O-Nb-1 | -16.85                  | -19.34        | -10.45        |
| H <sub>2</sub> O-Nb-2 | -5.20                   | -5.82         | -0.08         |
| H <sub>2</sub> O-Ta-1 | -20.45                  | -23.50        | -14.74        |
| H <sub>2</sub> O-Ta-2 | -5.24                   | -5.80         | -0.10         |
| O <sub>2</sub> -Co-1  | -17.48/-17.64           | -19.73/-19.85 | -10.66/-11.04 |
| O <sub>2</sub> -Ir-1  | -42.32/-5.85            | -45.20/-8.42  | -31.55/4.13   |
| O <sub>2</sub> -Rh-1  | -41.43/-14.18           | -44.03/-16.40 | -31.28/-5.27  |
| O <sub>2</sub> -Ru-1  | -11.08/-22.29           | -13.29/-24.45 | -3.27/-14.90  |
| O <sub>2</sub> -Nb-1  | -9.65                   | -11.85        | -1.78         |
| O <sub>2</sub> -Ta-1  | -9.06/-14.68            | -11.33/-16.65 | -1.24/-7.70   |

<sup>a</sup> All the energy units are in kcal/mol. The data behind the slash refer to the results of the triplet and quartet complexes involving O<sub>2</sub>.
